# Supplementary material for: Origin of enhanced reversible Na ion storage in hard carbon anodes through p-type molecular doping
Source: Royal Society of Chemistry journal article supplement (doi:10.1039/d2ta02295h), 2022-01-01
Supplement: d2ta02295h1.pdf [file d2ta02295h1.pdf]

## Supporting Information

### Origin of enhanced reversible Na ion storage in hard carbon anode through p-type molecular doping

*Gi-Hyeok Lee<sup>a,b†</sup>, Taesoon Hwang<sup>c,†</sup>, Jaebum Kim<sup>d</sup>, Junghoon Yang<sup>e</sup>, Feng Zou<sup>d</sup>, Maenghyo Cho<sup>c\*</sup>, Yong-Mook Kang<sup>d,f\*</sup>*

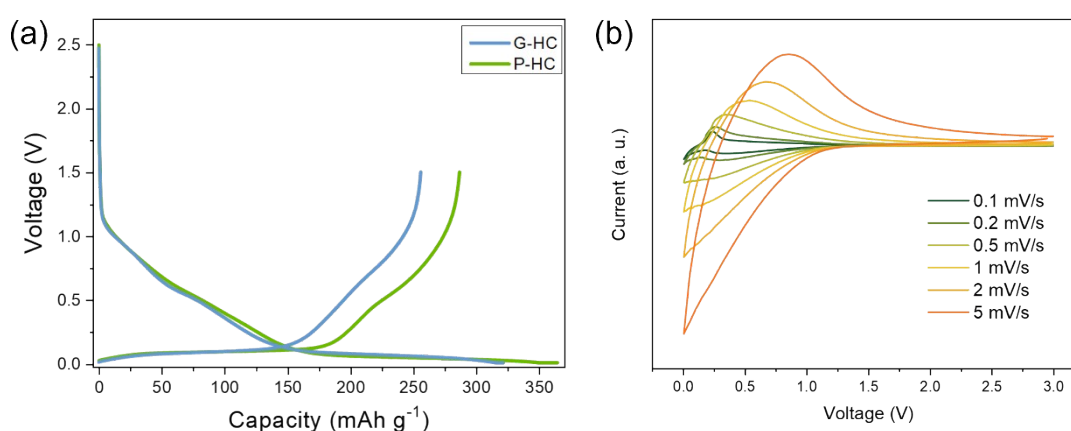

**Figure S1.** (a) Capacity comparison between G-HC (without PA) and P-HC (with PA). Capacity was enhanced through the doping of PA. (b) Cyclic voltammetry results of G-HC with various scan rates.

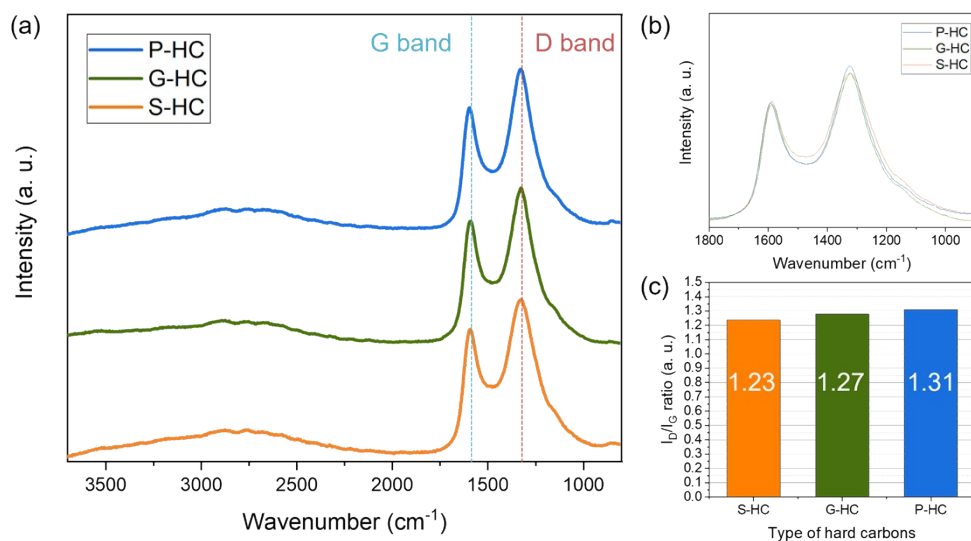

**Figure S2.** (a) Raman spectra of hard carbons with different precursor configurations. (b) Normalized and magnified spectra around G and D bands. (c) Ratios between the intensity of G and D bands.

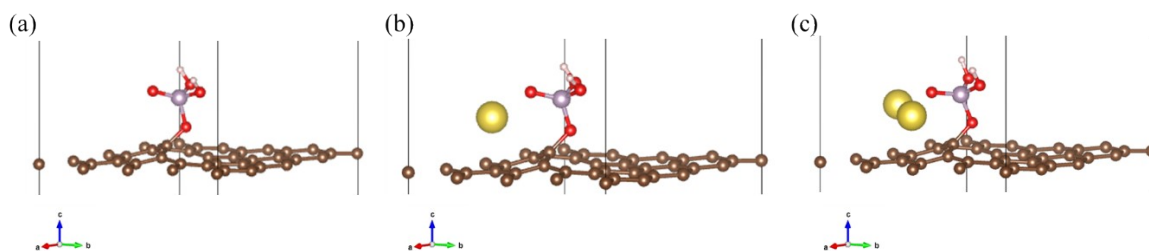

**Figure S3.** Atomic structures of  $\text{Na}_x\text{P-HC}$  as contents of (a)  $x = 0$ , (b)  $x = 1$  and (c)  $x = 2$

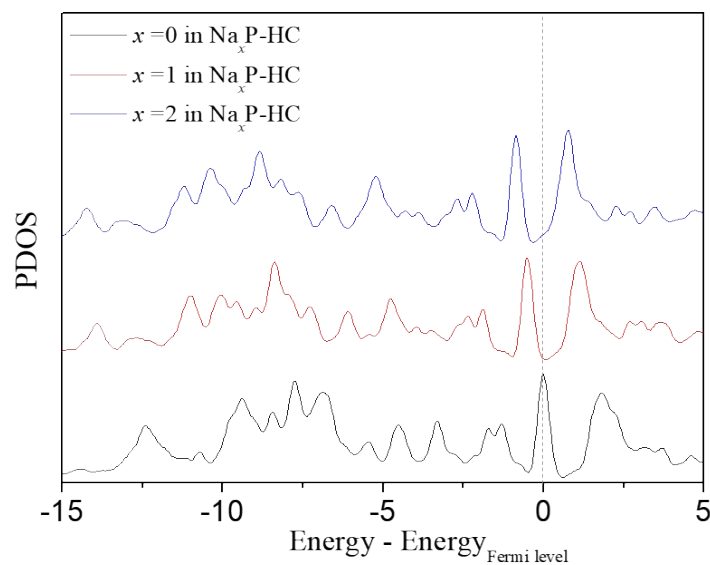

**Figure S4.** PDOS of carbon(C2) bonding with O in P-HC as Na contents

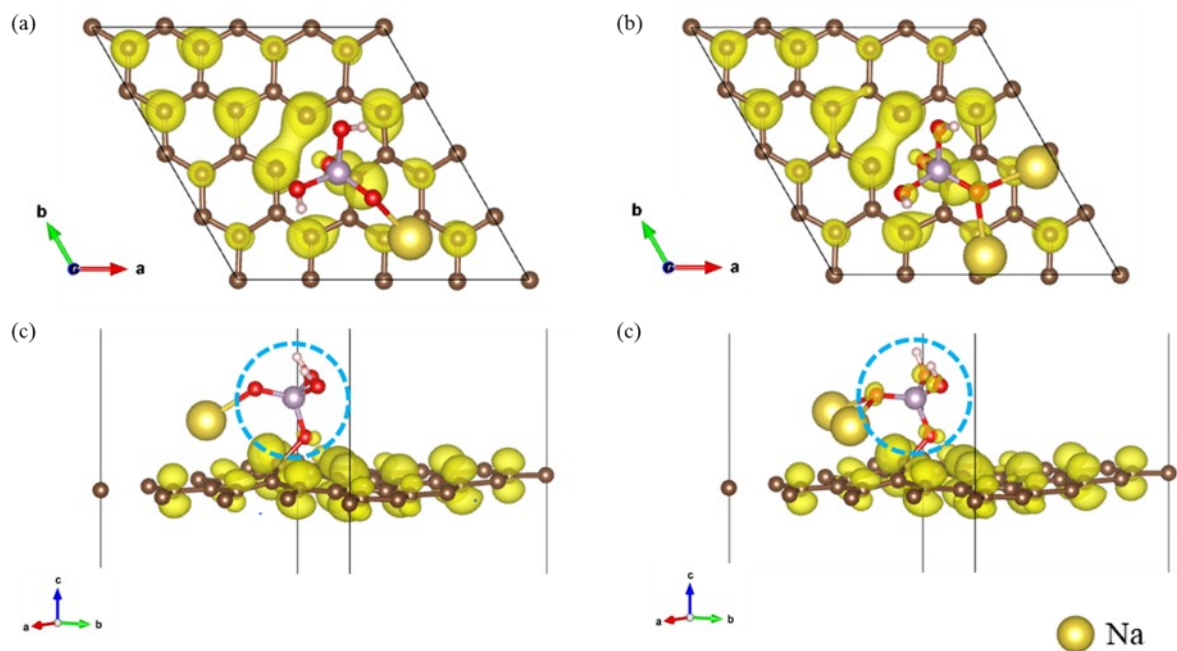

**Figure S5.** Spatial electron distribution of the occupied states from fermi level from -1 eV to 0eV as Na contents variation of (a, c)  $x = 1$  and (b, d)  $x = 2$  in  $\text{Na}_x\text{P-HC}$ .

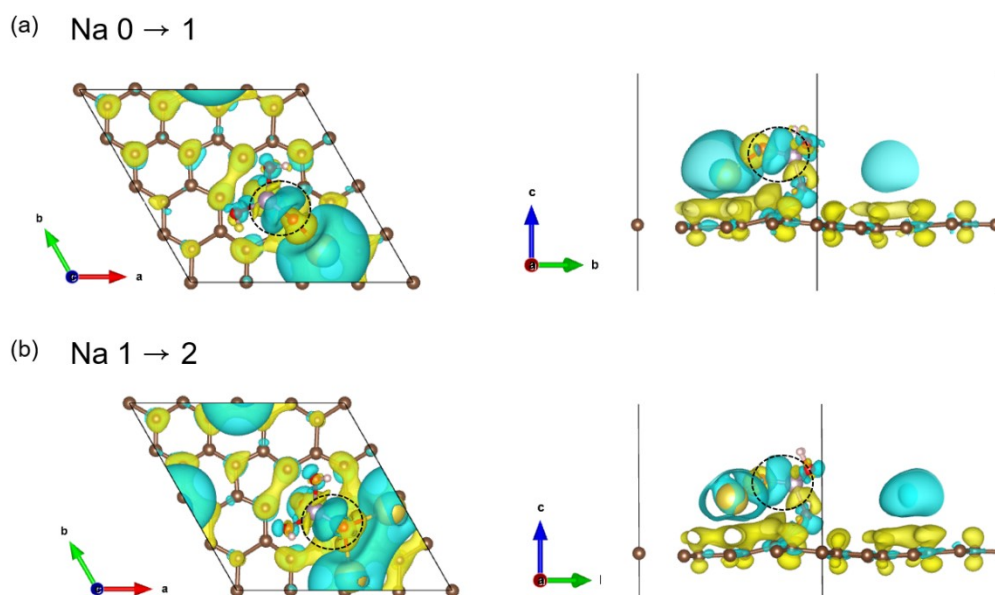

**Figure S6.** Spatial charge density variation of P-GL during the sodiation process. (yellow profiles are reduced states, while blue profiles are oxidized states)

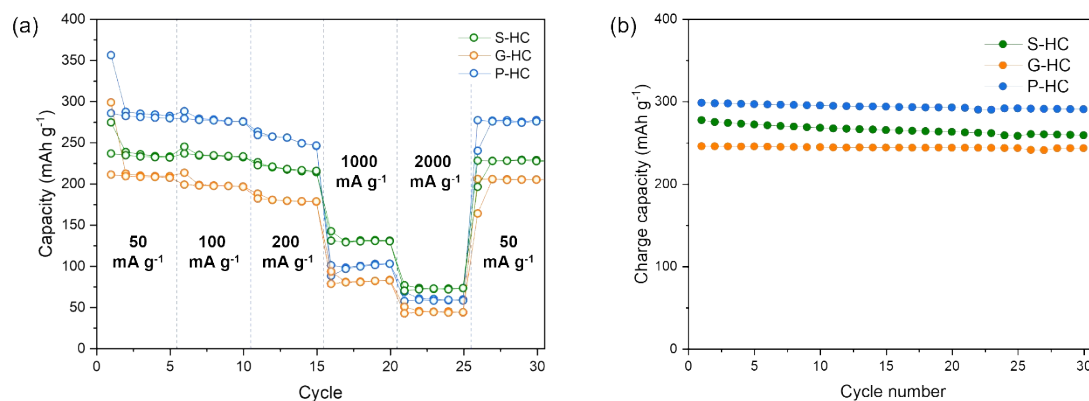

**Figure S7.** (a) Rate capabilities and (b) cyclabilities of hard carbons. The current density of the cyclability test is  $20 \text{ mA g}^{-1}$

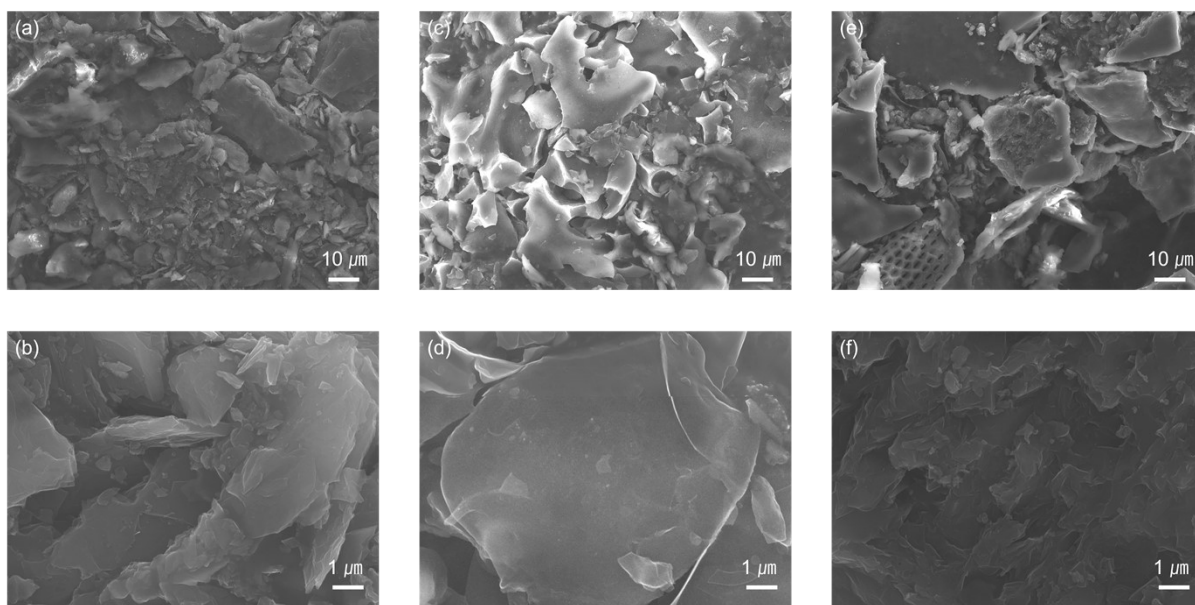

**Figure S8.** SEM images of hard carbons. (a, b) S-HC (c, d) G-HC (e, f) P-HC.

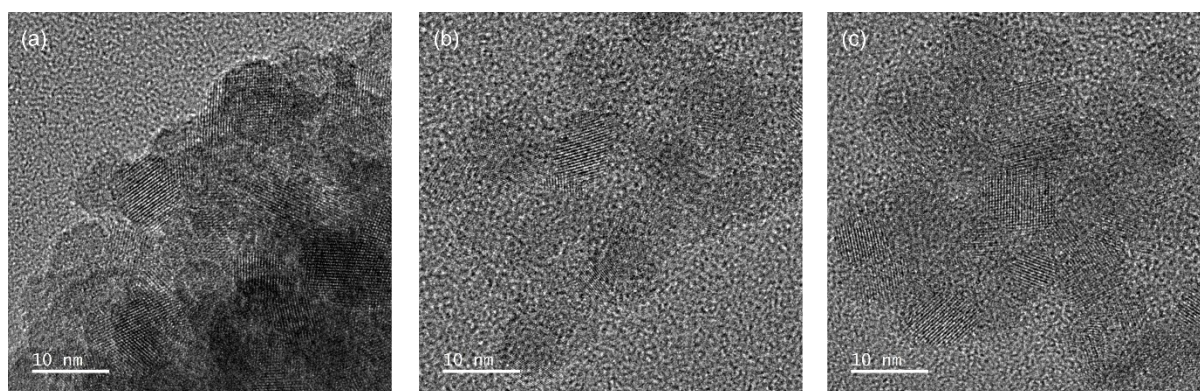

**Figure S9.** TEM images of hard carbons (a) S-HC (b) G-HC (c) P-HC

**Table S1.** The electric conductivities of hard carbons.

|      | Load<br>[kgf] | Conductivity<br>[S cm <sup>-1</sup> ] | Density<br>[g cc <sup>-1</sup> ] |
|------|---------------|---------------------------------------|----------------------------------|
| S-HC | 2000.00       | 23.980                                | 1.090                            |
| R-HC | 1999.00       | 35.075                                | 1.097                            |
| P-HC | 2000.00       | 39.759                                | 1.084                            |

**Table S2.** P=O bond lengths depending on the sodiation degree ( $x$ ) in Na <sub>$x$</sub> P-HC

| $x$ | P=O bond length<br>[Å] |
|-----|------------------------|
| 0   | 1.474                  |
| 1   | 1.495                  |
| 2   | 1.511                  |
